# Supplementary material for: Primal-Dual Value Function Approximation for Stochastic Dynamic Intermodal Transportation with Eco-Labels
Source: Atypon-hosted journal article supplement (doi:10.1287/trsc.2022.1164), 2022-10-14
Supplement: trsc.2022.1164.sm1.pdf [file trsc.2022.1164.sm1.pdf]

# Primal-Dual Value Function Approximation for Stochastic Dynamic Intermodal Transportation with Eco-labels

Arne Heinold, Frank Meisel

School of Economics and Business, Christian-Albrechts-Universität, Kiel, Germany, {arne.heinold;meisel}@bwl.uni-kiel.de

Marlin W. Ulmer

Department of Business Administration, Otto-von-Guericke-Universität, Magdeburg, Germany, marlin.ulmer@ovgu.de

---

## Contents

|                                                                     |          |
|---------------------------------------------------------------------|----------|
| <b>A.1 Rail corridor data and results</b>                           | <b>2</b> |
| <b>A.2 Illustration of an order's possible routings</b>             | <b>4</b> |
| <b>A.3 Notation of the sequential decision process</b>              | <b>5</b> |
| <b>A.4 Generic algorithm for VFA with basis functions</b>           | <b>6</b> |
| <b>A.5 Analysing overall emissions</b>                              | <b>7</b> |
| <b>A.6 The intermodal share under different solution approaches</b> | <b>8</b> |
| <b>A.7 Analyzing the fit of the feature sets</b>                    | <b>9</b> |

## Appendix A.1: Rail corridor data and results

Table A1 provides detailed information about the rail terminals and Table A2 provides descriptive statistics for the five rail corridors that are considered in the experimental study. Table A3 shows experimental results for each corridor.

Table A1: Rail terminals used in the experiments.

| id | country   | city                 | longitude | latitude  | NUTS2 code |
|----|-----------|----------------------|-----------|-----------|------------|
| 1  | Austria   | Enns                 | 14.464040 | 48.221026 | AT31       |
| 2  | Austria   | Vienna               | 16.419189 | 48.169662 | AT13       |
| 3  | Austria   | Wels                 | 14.061931 | 48.181697 | AT31       |
| 4  | Belgium   | Brussels             | 4.379132  | 50.878214 | BE10       |
| 5  | Belgium   | Liège                | 5.613670  | 50.644345 | BE33       |
| 6  | Bulgaria  | Sofia                | 23.309374 | 42.717075 | BG41       |
| 7  | Bulgaria  | Vidin                | 22.907837 | 44.005436 | BG31       |
| 8  | Croatia   | Zagreb               | 16.010578 | 45.757174 | HR04       |
| 9  | Denmark   | Copenhagen           | 12.565903 | 55.672019 | DK01       |
| 10 | Estonia   | Tallinn              | 24.738283 | 59.440381 | EE00       |
| 11 | France    | Avignon              | 4.838317  | 43.936140 | FRL0       |
| 12 | France    | Bordeaux             | -0.550549 | 44.789377 | FR11       |
| 13 | France    | Calais               | 1.848871  | 50.940848 | FRE1       |
| 14 | France    | Lille                | 3.001735  | 50.634354 | FRE1       |
| 15 | France    | Lyon                 | 4.847635  | 45.727409 | FRK2       |
| 16 | France    | Paris (Noisy-le-Sec) | 2.458354  | 48.896651 | FR10       |
| 17 | France    | Paris (Vaires-Torey) | 2.637652  | 48.875173 | FR10       |
| 18 | France    | Paris (Valenton)     | 2.460646  | 48.758967 | FR10       |
| 19 | Germany   | Berlin               | 13.369713 | 52.525051 | DE30       |
| 20 | Germany   | Braunschweig         | 10.539963 | 52.252608 | DE91       |
| 21 | Germany   | Bremen               | 8.813076  | 53.082983 | DE50       |
| 22 | Germany   | Cologne              | 7.013148  | 50.957723 | DEA2       |
| 23 | Germany   | Frankfurt am Main    | 8.662662  | 50.106530 | DE71       |
| 24 | Germany   | Halle / Leipzig      | 12.318222 | 51.622882 | DEE0       |
| 25 | Germany   | Hamburg              | 10.007076 | 53.552812 | DE60       |
| 26 | Germany   | Hamm                 | 7.809032  | 51.678358 | DEA5       |
| 27 | Germany   | Hanover              | 9.741539  | 52.376319 | DE92       |
| 28 | Germany   | Koblenz              | 7.590497  | 50.350254 | DEB1       |
| 29 | Germany   | Lübeck               | 10.670178 | 53.867052 | DEF0       |
| 30 | Germany   | Magdeburg            | 11.627278 | 52.130682 | DEE0       |
| 31 | Germany   | Mainz                | 8.259620  | 50.000914 | DEB3       |
| 32 | Germany   | Munich               | 11.560487 | 48.140116 | DE21       |
| 33 | Germany   | Nuremberg            | 11.082447 | 49.446139 | DE25       |
| 34 | Germany   | Regensburg           | 12.100189 | 49.012202 | DE23       |
| 35 | Germany   | Rostock              | 12.124909 | 54.138555 | DE80       |
| 36 | Germany   | Schwerte             | 7.562163  | 51.442592 | DEA5       |
| 37 | Greece    | Athens               | 23.667535 | 37.961970 | EL30       |
| 38 | Greece    | Thessaloniki         | 22.891929 | 40.665426 | EL52       |
| 39 | Hungary   | Budapest             | 19.087919 | 47.468587 | HU10       |
| 40 | Hungary   | Komarom              | 18.115012 | 47.749390 | SK02       |
| 41 | Italy     | Bologna              | 11.344115 | 44.506286 | ITH5       |
| 42 | Italy     | Cervignano A.G.      | 13.343164 | 45.823843 | ITH4       |
| 43 | Italy     | Florence             | 11.251361 | 43.787270 | ITI1       |
| 44 | Italy     | Milan                | 9.117494  | 45.511339 | ITC4       |
| 45 | Italy     | Napoli               | 14.288077 | 40.853414 | ITF3       |
| 46 | Italy     | Novara               | 8.624298  | 45.452662 | ITC1       |
| 47 | Italy     | Padova               | 11.880506 | 45.418542 | ITH3       |
| 48 | Italy     | Roma                 | 12.517239 | 41.892000 | ITI4       |
| 49 | Italy     | Rosarno              | 15.897764 | 38.423280 | ITF6       |
| 50 | Italy     | Turin                | 7.679198  | 45.062136 | ITC1       |
| 51 | Italy     | Venice               | 12.220498 | 45.484107 | ITH3       |
| 52 | Italy     | Verona               | 10.949910 | 45.427006 | ITH3       |
| 53 | Latvia    | Riga                 | 24.156870 | 56.943266 | LV00       |
| 54 | Lithuania | Kaunas               | 24.061114 | 54.913948 | LT00       |
| 55 | Norway    | Oslo                 | 10.761967 | 59.908491 | SE31       |
| 56 | Poland    | Poznan               | 16.911403 | 52.401943 | PL41       |
| 57 | Poland    | Warsaw               | 21.051751 | 52.252203 | PL12       |
| 58 | Portugal  | Grandola             | -8.554498 | 38.181846 | PT18       |
| 59 | Portugal  | Poцейrao             | -8.743508 | 38.634455 | PT17       |
| 60 | Portugal  | Sines                | -8.843050 | 37.939595 | PT18       |
| 61 | Romania   | Arad                 | 21.325276 | 46.189729 | RO42       |
| 62 | Romania   | Bucharest            | 26.041328 | 44.468362 | RO32       |
| 63 | Romania   | Calafat              | 22.925101 | 43.993994 | RO41       |
| 64 | Romania   | Cernavoda            | 28.071656 | 44.296271 | RO22       |
| 65 | Romania   | Constanta            | 28.583681 | 44.165262 | RO22       |
| 66 | Romania   | Craiova              | 23.817774 | 44.328616 | RO41       |

— Continued on next page —

— Continued Table A1 —

|    |                |                       |           |           |      |
|----|----------------|-----------------------|-----------|-----------|------|
| 67 | Romania        | Drobeta Turnu Severin | 22.643940 | 44.622050 | RO41 |
| 68 | Romania        | Timisoara             | 21.207632 | 45.750793 | RO42 |
| 69 | Slovakia       | Bratislava            | 17.147929 | 48.171346 | SK01 |
| 70 | Slovenia       | Ljubljana             | 14.614992 | 46.059614 | SI02 |
| 71 | Spain          | Algeciras             | -5.449048 | 36.126428 | ES61 |
| 72 | Spain          | Barcelona             | 2.192621  | 41.385915 | ES51 |
| 73 | Spain          | Cartagena             | -0.974878 | 37.605154 | ES62 |
| 74 | Spain          | Cordoba               | -4.789366 | 37.888424 | ES61 |
| 75 | Spain          | Madrid                | -3.674798 | 40.386403 | ES30 |
| 76 | Spain          | Murcia                | -1.027458 | 38.007272 | ES62 |
| 77 | Spain          | Tarragona             | 1.253371  | 41.111766 | ES51 |
| 78 | Spain          | Valencia              | -0.370571 | 39.441337 | ES52 |
| 79 | Spain          | Valladolid            | -4.726878 | 41.642059 | ES41 |
| 80 | Sweden         | Gothenburg            | 11.998932 | 57.719147 | SE23 |
| 81 | Sweden         | Malmo                 | 13.000177 | 55.609093 | SE22 |
| 82 | Sweden         | Stockholm             | 18.057823 | 59.330709 | SE11 |
| 83 | Sweden         | Trelleborg            | 13.170864 | 55.369546 | SE22 |
| 84 | United Kingdom | Folkestone            | 1.159358  | 51.097539 | UKJ4 |
| 85 | United Kingdom | Glasgow               | -4.257533 | 55.859122 | UKM8 |
| 86 | United Kingdom | London                | -0.123176 | 51.531637 | UKI2 |

**Table A2** Descriptive statistics for the considered rail corridors.

| source    | target    | avg. num. orders | terminals                                                                                                                 | dist. between stops (km)                                                                                                                                                                                 |
|-----------|-----------|------------------|---------------------------------------------------------------------------------------------------------------------------|----------------------------------------------------------------------------------------------------------------------------------------------------------------------------------------------------------|
| Constanta | Cartagena | 237              | 65, 64, 62, 66, 67, 68, 61, 39, 8, 70, 42,<br>51, 47, 52, 44, 46, 50, 15, 11, 72, 77, 78,<br>76, 73 (count: 24)           | 48.1, 185.5, 210.5, 113.8, 210.4, 57.4,<br>25.5, 251.5, 44.4, 35.9, 100.8, 28.0,<br>85.3, 152.2, 42.0, 99.7, 88.7, 232.8,<br>304.7, 92.4, 257.3, 99.1, 54.5 (avg:<br>122.6)                              |
| Glasgow   | Athens    | 261              | 85, 86, 84, 13, 14, 4, 5, 22, 28, 31, 23,<br>33, 34, 3, 1, 2, 69, 40, 39, 61, 68, 67, 66,<br>63, 7, 6, 38, 37 (count: 28) | 13.7, 89.3, 56.8, 105.3, 124.3, 104.0,<br>16.8, 92.8, 100.0, 37.3, 226.8, 100.4,<br>118.9, 38.5, 183.7, 66.2, 46.2, 94.1,<br>222.3, 57.4, 210.4, 113.8, 111.8, 16.4,<br>270.6, 209.6, 210.0 (avg: 112.5) |
| Oslo      | Sines     | 224              | 55, 80, 81, 9, 29, 25, 21, 27, 26, 36, 22,<br>5, 4, 14, 16, 17, 18, 12, 79, 59, 58, 60<br>(count: 22)                     | 93.1, 146.6, 21.4, 63.8, 62.5, 116.7,<br>122.2, 176.1, 34.2, 81.3, 83.2, 104.0,<br>124.3, 231.7, 14.3, 24.7, 110.5, 198.2,<br>46.2, 57.1, 77.4 (avg: 94.7)                                               |
| Stockholm | Rosarno   | 180              | 82, 81, 83, 35, 19, 24, 34, 32, 52, 47, 41,<br>43, 48, 45, 49 (count: 15)                                                 | 46.1, 33.3, 159.6, 227.5, 134.3, 200.7,<br>138.0, 89.4, 85.3, 123.9, 92.2, 260.2,<br>236.0, 416.5 (avg: 160.2)                                                                                           |
| Tallinn   | Algeciras | 230              | 10, 53, 54, 57, 56, 19, 30, 20, 27, 26, 36,<br>22, 5, 4, 14, 16, 17, 18, 12, 79, 75, 74,<br>71 (count: 23)                | 56.5, 44.8, 122.2, 305.4, 173.1, 145.6,<br>82.8, 66.6, 176.1, 34.2, 81.3, 83.2,<br>104.0, 124.3, 231.7, 14.3, 24.7, 110.5,<br>198.2, 189.4, 172.6, 48.8 (avg: 117.7)                                     |

**Table A3** Average objective's lower-bound gap for each corridor.

| source    | target    | objective costs |        |        | objective eco-labels |        |        |
|-----------|-----------|-----------------|--------|--------|----------------------|--------|--------|
|           |           | single stage    | VFA CO | VFA EL | single stage         | VFA CO | VFA EL |
| Constanta | Cartagena | 13.21           | 3.87   | 6.79   | 79.43                | 23.37  | 10.46  |
| Glasgow   | Athens    | 10.55           | 3.36   | 5.81   | 65.29                | 24.71  | 11.56  |
| Oslo      | Sines     | 17.06           | 4.48   | 8.09   | 71.50                | 17.83  | 9.73   |
| Stockholm | Rosarno   | 8.85            | 4.08   | 6.51   | 55.49                | 16.95  | 9.73   |
| Tallinn   | Algeciras | 12.89           | 3.84   | 6.37   | 75.97                | 20.97  | 10.34  |
| average   |           | 12.51           | 3.93   | 6.71   | 69.54                | 20.77  | 10.36  |

### Appendix A.2: Illustration of an order's possible routings

Figure A1 illustrates an order's possible routings in which the dashed lines represent truck transportation, used in the pre- and post-carriage to/from the terminals and for the direct (road-only) routing whereas the solid lines represent the transportation via train. In our illustrative example, three terminals qualify for loading (I, II, III) and two terminals for unloading (X, XI), resulting in six possible intermodal paths for this order.

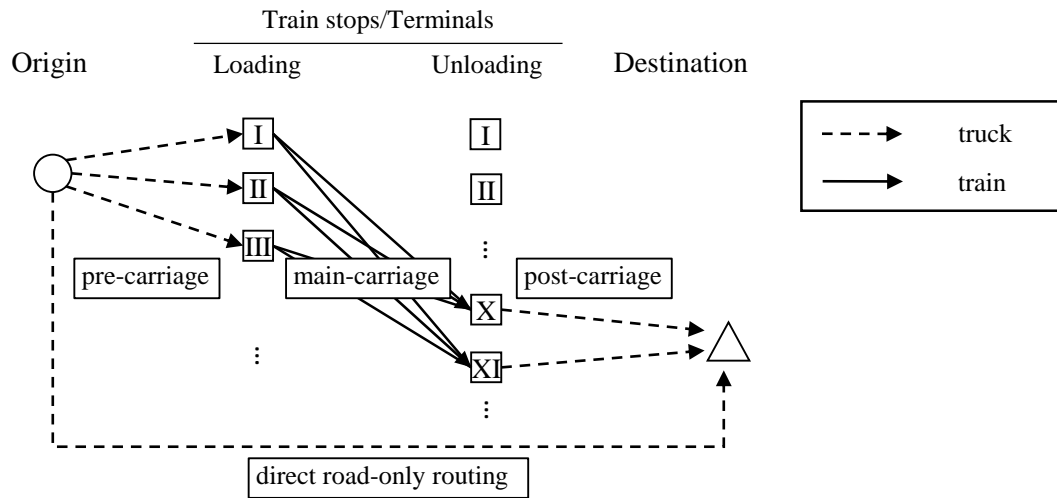

Figure A1 Illustration of an order's possible routings.

### Appendix A.3: Notation of the sequential decision process

An overview of the notation that is used in the sequential decision process is provided in Table A4.

**Table A4 Overview of the notation used in the sequential decision process.**

| name                            | description                                                                                                         |
|---------------------------------|---------------------------------------------------------------------------------------------------------------------|
| <b>General notation</b>         |                                                                                                                     |
| $\bar{e}_o$                     | upper emission limit induced by eco-label $\lambda_o$ of an order $o \in \mathcal{O}_t$                             |
| $q_o$                           | payload quantity of an order $o \in \mathcal{O}_t$                                                                  |
| $t_p^1 / t_p^2$                 | loading/unloading terminal of a path $p \in \mathcal{P}_t$                                                          |
| $\lambda_o$                     | eco-label of an order $o \in \mathcal{O}_t$                                                                         |
| $\mathcal{T}$                   | set of decision points / train stops / terminals                                                                    |
| $\mathcal{O}_t$                 | set of orders in decision point $t \in \mathcal{T}$                                                                 |
| $\mathcal{P}_t$                 | set of paths in decision point $t \in \mathcal{T}$                                                                  |
| $\mathcal{P}_t^o$               | set of paths of an order $o \in \mathcal{O}_t$ in decision point $t \in \mathcal{T}$                                |
| $\mathcal{T}_p$                 | set of terminals visited by a path $p \in \mathcal{P}_t$                                                            |
| <b>State</b>                    |                                                                                                                     |
| $\mathbf{f}_t$                  | binary vector describing which orders violate their eco-label in a state $S_t$                                      |
| $f_t(o)$                        | =1, if order $o \in \mathcal{O}$ violates its eco-label in a state $S_t$ , =0 else                                  |
| $\mathbf{r}_t$                  | binary vector describing which paths are used in a state $S_t$                                                      |
| $r_t(p)$                        | =1, if path $p \in \mathcal{P}$ is used in a state $S_t$ , =0 else                                                  |
| $S_t$                           | state in decision point $t \in \mathcal{T}$                                                                         |
| <b>Decision</b>                 |                                                                                                                     |
| $e_t^x(p)$                      | overall emissions (truck and train) of path $p \in \mathcal{P}$ under the decision in a state $S_t$ , =0 else       |
| $l_t^x(t')$                     | load of the train at terminal $t' \in \mathcal{T}$ under the decision in a state $S_t$ , =0 else                    |
| $L^{\max}$                      | capacity of the train                                                                                               |
| $\mathbf{x}_t$                  | binary vector describing which paths are used under the decision in a state $S_t$                                   |
| $x_t(p)$                        | =1, if path $p \in \mathcal{P}_t$ is used under the decision in a state $S_t$ , =0 else                             |
| $\mathcal{X}(S_t)$              | set of feasible decisions in a state $S_t$                                                                          |
| <b>Reward</b>                   |                                                                                                                     |
| $c_p$                           | overall costs (truck and train) of a path $p \in \mathcal{P}_t$                                                     |
| $e_t^{\text{train}}(l_t^x(t'))$ | train emissions under a load $l_t^x(t')$                                                                            |
| $e_t^{\text{truck}}(p)$         | truck emissions of a path $p \in \mathcal{P}_t$                                                                     |
| $\mathbf{f}_t^x$                | binary vector describing which orders violate their eco-label under a decision $\mathbf{x}_t$                       |
| $f_t^x(o)$                      | =1, if order $o \in \mathcal{O}$ is routed in accordance to its eco-label under a decision $\mathbf{x}_t$ , =0 else |
| $R(\cdot)$                      | reward function                                                                                                     |
| $R^C(\cdot)$                    | reward function for objective costs                                                                                 |
| $R^E(\cdot)$                    | reward function for objective eco-labels                                                                            |
| $\alpha$                        | parameter to weight $R^C(\cdot)$ and $R^E(\cdot)$ in the objective function                                         |
| <b>Post-decision state</b>      |                                                                                                                     |
| $\mathcal{P}_t^x$               | set of paths in a post-decision state $S_t^x$                                                                       |
| $\mathcal{P}^{o,x}$             | set of available paths of an order $o \in \mathcal{O}$ in a post-decision state $S_t^x$                             |
| $S_t^x$                         | post-decision state in decision point $t \in \mathcal{T}$                                                           |
| <b>Stochastic information</b>   |                                                                                                                     |
| $\hat{\omega}_{t+1}$            | stochastic information in decision point $t+1 \in \mathcal{T}$                                                      |
| $\tilde{\mathcal{O}}_{t+1}$     | set of new orders in decision point $t+1 \in \mathcal{T}$                                                           |
| $\tilde{\mathcal{P}}_{t+1}$     | set of new paths in decision point $t+1 \in \mathcal{T}$                                                            |
| $\Omega$                        | set of stochastic information                                                                                       |
| <b>Transition</b>               |                                                                                                                     |
| $S^M(\cdot)$                    | system model function to transform to the next state                                                                |
| <b>Optimal policy</b>           |                                                                                                                     |
| $V_t(S_t^x)$                    | value of post-decision state $S_t^x$                                                                                |
| $\pi$                           | policy describing a decision for each decision point                                                                |
| $\Pi$                           | set of all policies                                                                                                 |

#### Appendix A.4: Generic algorithm for VFA with basis functions

Algorithm 1 outlines a generic framework for VFA with basis functions. Step 1 is to initialize the feature weights  $\theta_a^0$ , which is done by using 0 for all features in our experiments. This results in an initially myopic policy. The problem is then solved in  $N$  iterations under Step 2, where each iteration simulates a single trip of the train along its route for a sampled set of orders appearing at each terminal, i.e., in each iteration we compute one trajectory of the problem. Thereby,  $N$  is a sufficiently large iteration counter at which the approximations converged sufficiently. It is parameterized by experiment. At each iteration  $n = 1, 2, \dots, N$ , we randomly draw an information  $\hat{\omega}_1^n$  that yields the currently known orders for the initial state  $S_1^n$  (in which the train is at the first terminal), see Step 2a. From here, we solve the problem in a forward programming manner once for each decision point  $t = 1, 2, \dots, T - 1$ . In particular, we find a decision  $x_t^n$  in Step 2b by solving the MIP with the latest values of the features' weights  $\theta_a^{n-1}$  (the weights obtained after the previous iteration). The MIP is formally described at the end of this section. The decision and the value of the corresponding post decision state are stored in Step 2c as they are used later in the updating process. Then, in Step 2d, we draw an outcome of the random information  $\hat{\omega}_{t+1}^n$  to obtain new orders and transform to the next state  $S_{t+1}^n$  using the transition function  $S^M(\cdot)$ . Finally, after making the last decision in the last relevant decision point  $T - 1$  (the train's penultimate stop), we update the weights of the features in Step 2e using the stored values from Step 2c. The value of  $S_t^{n,x}$  can be calculated as the difference in accumulated reward in  $t$  and  $T$ .

**Step 1:** Choose initial values for weights  $\theta_a^0$  of all features  $a \in \mathcal{A}$ ,

**Step 2:** for  $n = 1, 2, \dots, N$  do

**Step 2a:** Draw information  $\hat{\omega}_1^n \in \Omega$  for initial state  $S_1^n$ .

for  $t = 1, 2, \dots, T-1$  do

**Step 2b:** Find primal decision  $x_t^n$  by solving the MIP model using weights  $\theta_a^{n-1}$ .

**Step 2c:** Store decision  $x_t^n$ , post-decision state  $S_t^{n,x}$ , and accumulated reward.

**Step 2d:** Draw information  $\hat{\omega}_{t+1}^n \in \Omega$  and transform to next state:  $S_{t+1}^n = S^M(\cdot)$ .

end

**Step 2e:** Update weights  $\theta_a^n$  for all features  $a \in \mathcal{A}$  using the values from step 2c.

end

**Algorithm 1:** Generic algorithm for VFA with basis functions.

## Appendix A.5: Analysing overall emissions

We report in this section results from minimizing overall emissions of a solution and their interplay with the objectives of minimizing costs and eco-label violations. We do this by considering an objective ‘emissions’ in which overall emissions are minimized. For this, we define  $R_t^{CO_2}(S_t, \mathbf{r}_t, \mathbf{x}_t) = \sum_{p \in \mathcal{P}_t} e_t^x \cdot (x_t(p) - r_t(p))$  as the reward that is used in the sequential decision process. The pareto frontiers for this objective and objectives costs and eco-labels is shown in Figures A2a and A2b. The pareto frontiers are calculated like the pareto frontier in paper. For reasons of readability, we only show results for the dual solution as well as *VFA EL* and *VFA CO* for objectives eco-labels and costs, respectively. We make two important observations. First, our VFAs also learn under the objective of minimizing overall emissions. In particular, *VFA CO* and *VFA EL* both result in a lower-bound gap of about 4% under the pure emission objective, indicating that these routings are very close to the dual solution assuming an ex-post decision making under perfect information. Second, the shapes of the pareto frontiers constitute the trade-off between the different objectives. In particular, achieving low overall emissions comes along with higher overall costs as well as solutions in which less orders are routed in accordance to their requested eco-labels. The figures also reveal that the trade-off between emissions and eco-labels is much stronger than it is between emissions and costs, e.g., the lower-bound gap of eco-labels is higher compared to the lower-bound gap of costs under a pure emission objective. There are two reasons for this. First, objectives emissions and costs generally tend to point towards similar routings (e.g., Kopfer et al. 2014) and, second, we treat the fulfillment of eco-labels in a binary manner (yes or no) and not as a relative measure. The latter reason results in a decision making in which the carrier does not consider the magnitude at which an order fails to meet its requested eco-label. For a discussion of this issue we refer to Heinold and Meisel (2020) for an intermodal transportation problem in which the emissions exceeding an order’s emission limit are minimized too.

(a) Pareto frontiers for varying weights of objectives costs and emissions.

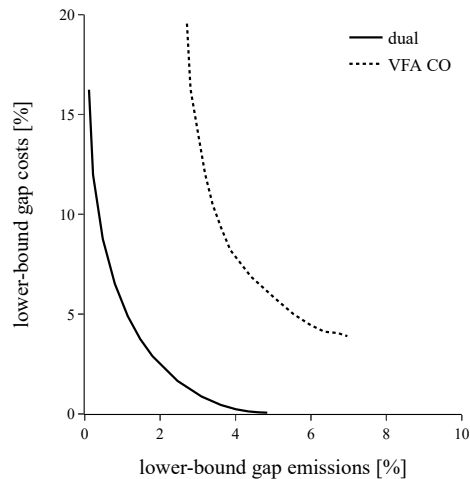

(b) Pareto frontiers for varying weights of objectives eco-labels and emissions.

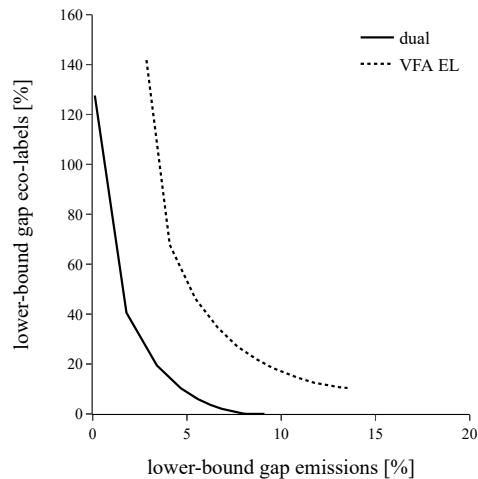

**Figure A2** Pareto frontiers for objectives emissions vs. costs and objectives emissions vs. eco-labels.

## Appendix A.6: The intermodal share under different solution approaches

The intermodal share under different solution approaches is shown in Figure A3.

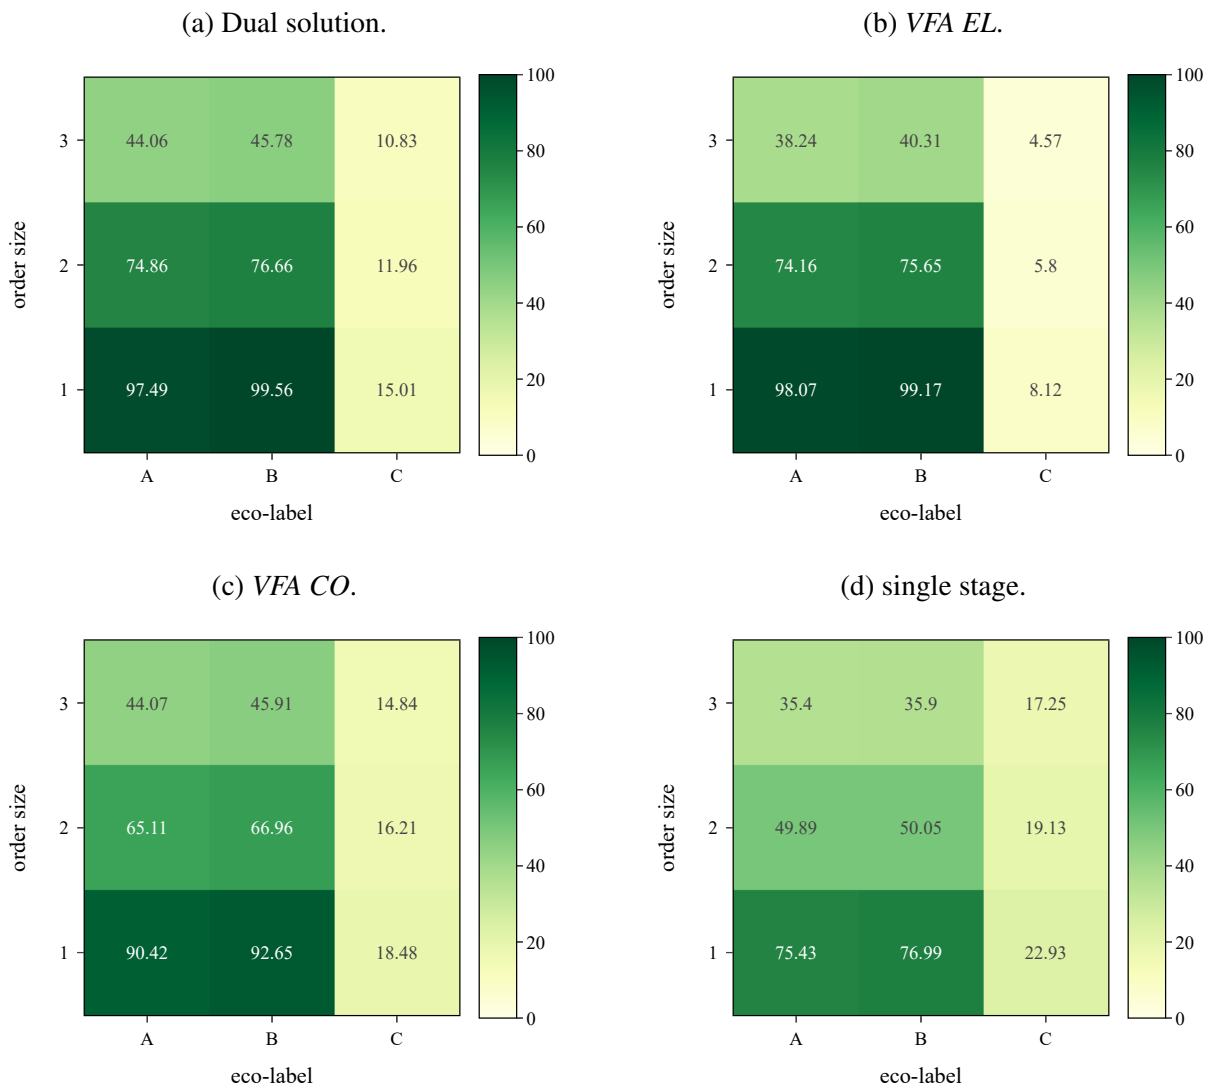

**Figure A3** The intermodal share under objective eco-labels for combinations of an order's eco-label and size.

### Appendix A.7: Analyzing the fit of the feature sets

We report in Table A5 the coefficient of determination ( $R^2$ ) resulting from a regression between the optimal value (calculated ex-post like the dual trajectory) and the value from the VFA approach in the final decision point  $T$ . Thus, it is a general indicator for the fit of a feature set by measuring whether it is suited to predict the value in the final decision point, or not. The table shows values for both performance measures under both objective for the VFA approaches as well as the benchmark single-stage heuristic. For objective eco-labels, the values for all feature sets and for both measures are high ( $R^2=1$  means a perfect fit) and differences between VFA approaches are small. In contrast, for objective costs, differences between the sets are once again small, but  $R^2$  is clearly higher for the (corresponding) measure costs than for measure eco-labels. This means that the objective costs does not work well for complying with eco-labels, whereas the objective eco-labels also leads to relatively good values for the measure costs. This observation is also in line with the finding from the pareto frontier in the experimental study in which the gaps for eco-labels are higher under the pure cost objective compared to the gaps for costs under the pure eco-label objective. This is also shown in the results for the single-stage heuristic in which  $R^2$  is higher for the measure costs than it is for the measure eco-labels under both objectives. Here, we note that  $R^2$  values of the single-stage heuristic are generally high for both measures and both objectives, although the results in our experimental section have shown that the approach does not perform so well when looking at the lower-bound gap. This confirms that the  $R^2$  as calculated in this section works as an indicator for the fit of a policy but has a limited use when it comes to predicting its actual performance (e.g., Mes and Rivera 2017).

**Table A5** Coefficient of determination ( $R^2$ ) of the solution approaches under both objectives.

|                      | single stage | VFA EL | VFA CO | VFA All |
|----------------------|--------------|--------|--------|---------|
| objective eco-labels |              |        |        |         |
| eco-labels           | 0.7818       | 0.9567 | 0.9289 | 0.9252  |
| costs                | 0.9806       | 0.9250 | 0.9109 | 0.9064  |
| objective costs      |              |        |        |         |
| eco-labels           | 0.7380       | 0.7495 | 0.7636 | 0.7546  |
| costs                | 0.9860       | 0.9835 | 0.9967 | 0.9901  |

To further test the fit of our feature sets, we look at the performance of the VFAs for test problem instances that somewhat differ from those that were used in the learning. In particular, we test the performance of the basis functions that were learned under the default setting (i.e., order size  $q_o$  is 1, 2, or 3 FTL with equal probability) on a setting in which all orders have an identical equal size of either 1, 2, or 3 FTL. We show results for objectives costs and eco-labels in Figures A4 and A5, respectively. We present the box plots for solution approaches single stage, VFA CO (for objective costs) and VFA EL (for objective eco-labels), where ‘\*’ denotes that the VFA is learned under the default setting, whereas learning and testing distribution is the same otherwise. It can be seen that the performance of the VFAs is better than the benchmark heuristic in all of the considered experiments. Furthermore, the VFAs learned under the default distribution perform similar to the VFAs learned under the equal-size distributions. In particular, VFA CO\* and VFA EL\* perform as good as VFA CO and VFA EL for  $q = 2$  and  $q = 3$  and for  $q = 1$  and  $q = 2$  under objectives costs and eco-labels, respectively. Overall, we conclude that our feature sets also work well in settings with other distributions.

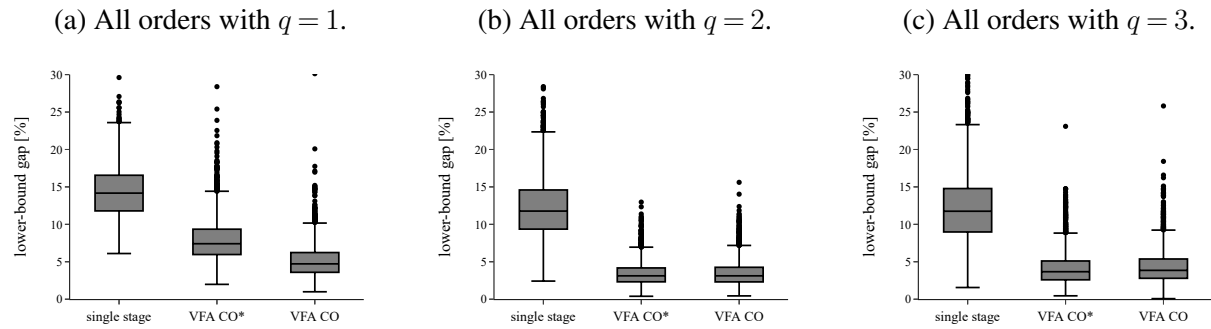

**Figure A4** Results for objective costs and approaches single stage, *VFA CO*, and *VFA CO\** under different settings of equal-size orders.

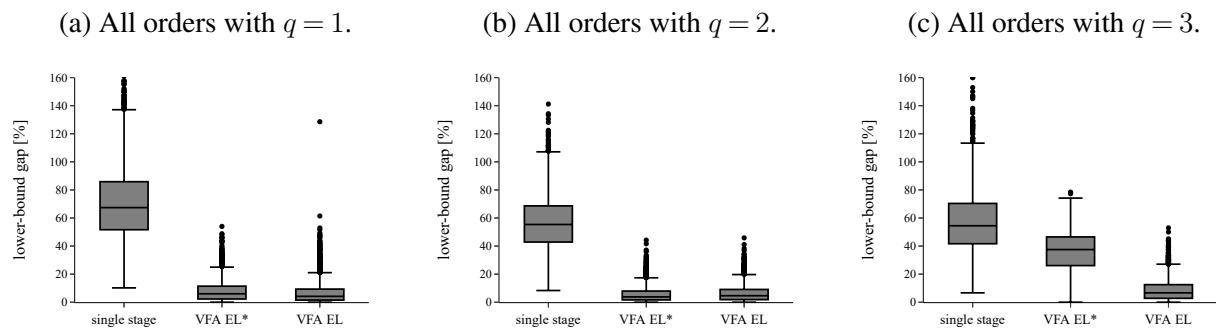

**Figure A5** Results for objective eco-labels and approaches single stage, *VFA EL*, and *VFA EL\** under different settings of equal-size orders.

## References

- Heinold, A. and Meisel, F. (2020). Emission limits and emission allocation schemes in intermodal freight transportation, *Transportation Research Part E: Logistics and Transportation Review* **141**: 101963.
- Kopfer, H. W., Schönberger, J. and Kopfer, H. (2014). Reducing greenhouse gas emissions of a heterogeneous vehicle fleet, *Flexible Services and Manufacturing Journal* **26**(1): 221–248.
- Mes, M. R. K. and Rivera, A. P. (2017). Approximate dynamic programming by practical examples, in R. J. Boucherie and N. M. van Dijk (eds), *Markov Decision Processes in Practice*, Springer International Publishing, Cham, pp. 63–101.
